# Supplementary material
Source: Royal Society of Chemistry journal article supplement (doi:10.1039/d6ja00095a)
Supplement: d6ja00095a1.pdf [file d6ja00095a1.pdf]

### Supplementary Information for

## Optimization of an Infrared-Heated Sample Introduction System for Single-Particle Inductively Coupled Plasma Mass Spectrometry Analysis of Metal-Labelled Ion-Exchange Polymer Microparticles

By

Zichao Zhou, Matthias Schmitt, Andreas Seubert, and Diane Beauchemin

| Type | Origin                 | Size (μm) | Size distribution | Functional group             | % (m/m) s*  | Mass concentration (mg L <sup>-1</sup> ) | PNC (number of MPs/L) |
|------|------------------------|-----------|-------------------|------------------------------|-------------|------------------------------------------|-----------------------|
| A    | Self-prepared resin    | 4.5       | Narrow            | SO <sub>3</sub> <sup>-</sup> | 7.212       | 20                                       | 7.7 * 10 <sup>8</sup> |
| B    | Commercially available | 10        | Heterogeneous     | SO <sub>3</sub> <sup>-</sup> | 0.31 ± 0.03 | 100                                      | 2.9 * 10 <sup>8</sup> |

**Table S1.** Characteristics of cation-exchange resins and their respective slurry stock solutions.

\* determined using a Schoeniger combustion with subsequent sulfate quantitation using anion-exchange chromatography (Offline Combustion IC)

**Table S2.** Operating conditions used for 2-parameter optimization (with a central composite design) of the IR-heated sample introduction system

| StdOrder | RunOrder | PtType | Blocks | IR temperature (°C) | Sample uptake rate (μL min <sup>-1</sup> ) |
|----------|----------|--------|--------|---------------------|--------------------------------------------|
| 6        | 1        | 0      | 1      | 135                 | 50                                         |
| 3        | 2        | 1      | 1      | 20                  | 75                                         |
| 1        | 3        | 1      | 1      | 20                  | 25                                         |
| 4        | 4        | 1      | 1      | 250                 | 75                                         |
| 2        | 5        | 1      | 1      | 250                 | 25                                         |
| 7        | 6        | 0      | 1      | 135                 | 50                                         |
| 5        | 7        | 0      | 1      | 135                 | 50                                         |
| 13       | 8        | 0      | 2      | 135                 | 50                                         |
| 11       | 9        | -1     | 2      | 135                 | 75                                         |
| 14       | 10       | 0      | 2      | 135                 | 50                                         |
| 10       | 11       | -1     | 2      | 135                 | 25                                         |
| 9        | 12       | -1     | 2      | 250                 | 50                                         |
| 12       | 13       | 0      | 2      | 135                 | 50                                         |

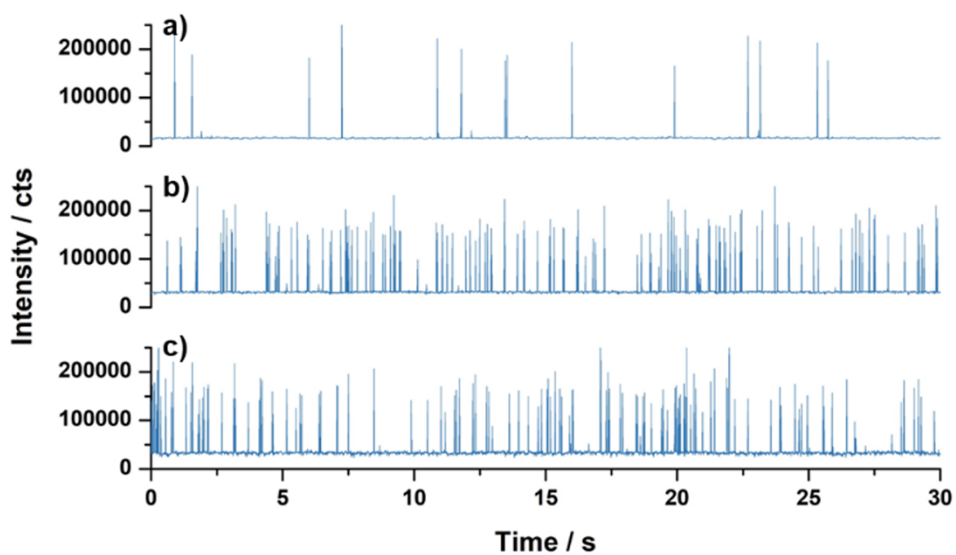

**Fig. S1** Exemplary datasets at  $50 \mu\text{L min}^{-1}$  sample uptake rate using the IR-heated system for  $\text{Ba}^{2+}$ -labelled resin of type A ( $1 \text{ mg L}^{-1}$ ) at different IR-heating temperatures: **a)**  $20 \text{ }^\circ\text{C}$ ,  $1210 \pm 110 \text{ MPs}$ , **b)**  $135 \text{ }^\circ\text{C}$ ,  $5550 \pm 260 \text{ MPs}$ , **c)**  $250 \text{ }^\circ\text{C}$ ,  $5490 \pm 220 \text{ MPs}$ .

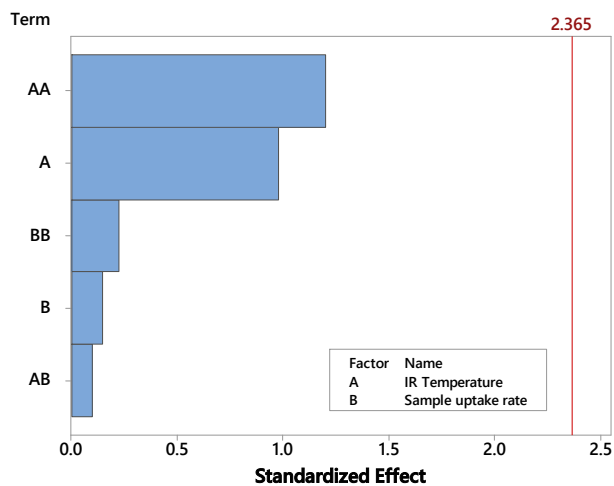

**Fig. S2** Pareto chart of the standardized effects for IR heating temperature and sample uptake rate. The dashed red bar is the threshold for a statistically significant effect.

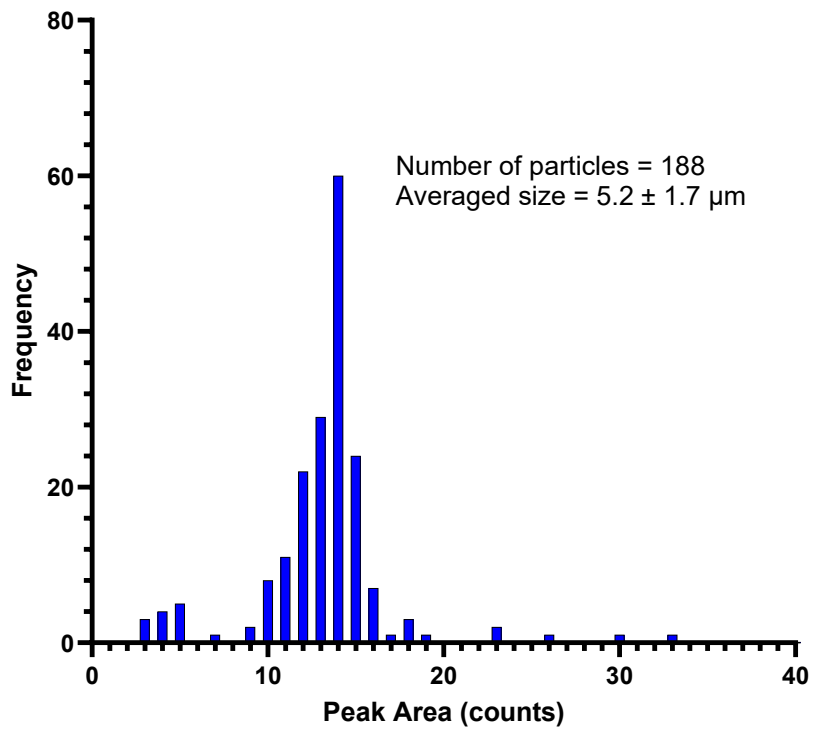

Fig. S3 Peak area distribution of the 4  $\mu\text{m}$  MPs of type A obtained using a standard cyclonic spray chamber

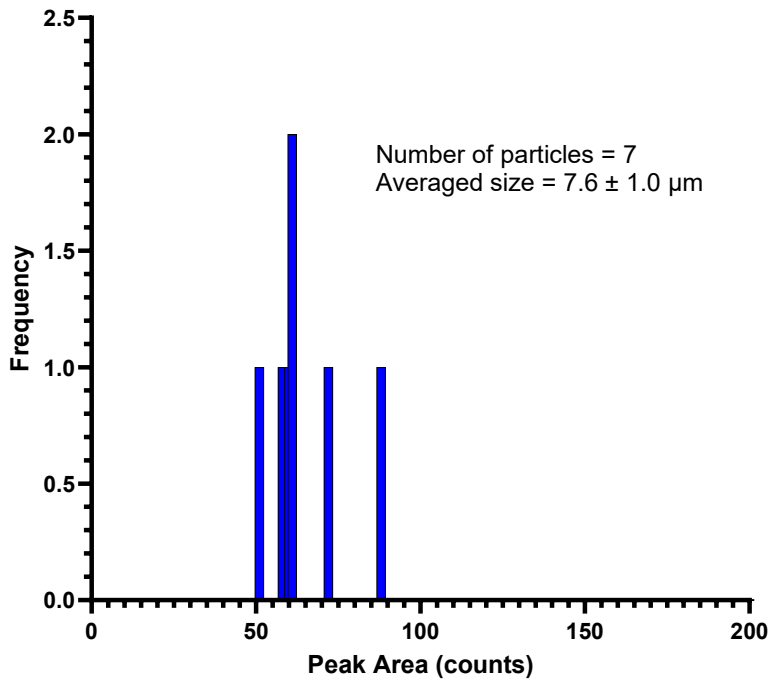

Fig. S4 Peak area distribution of the 10  $\mu\text{m}$  MPs of type B obtained using a standard cyclonic spray chamber
